# Supplementary material for: Profiling host ANP32A splicing landscapes to predict influenza A virus polymerase adaptation
Source: PubMed Central journal article supplement (PMC6667478; doi:10.1038/s41467-019-11388-2), 2019-07-30
Supplement: 41467_2019_11388_MOESM1_ESM.pdf [file 41467_2019_11388_MOESM1_ESM.pdf]

## Supplementary Information

### **Profiling Host ANP32A Splicing Landscapes to Predict Influenza A Virus Polymerase Adaptation**

Domingues *et al.*

Corresponding author: Benjamin G. Hale

Email: [hale.ben@virology.uzh.ch](mailto:hale.ben@virology.uzh.ch)

#### **This PDF file includes:**

Supplementary Figures 1-3

Supplementary Tables 1-4

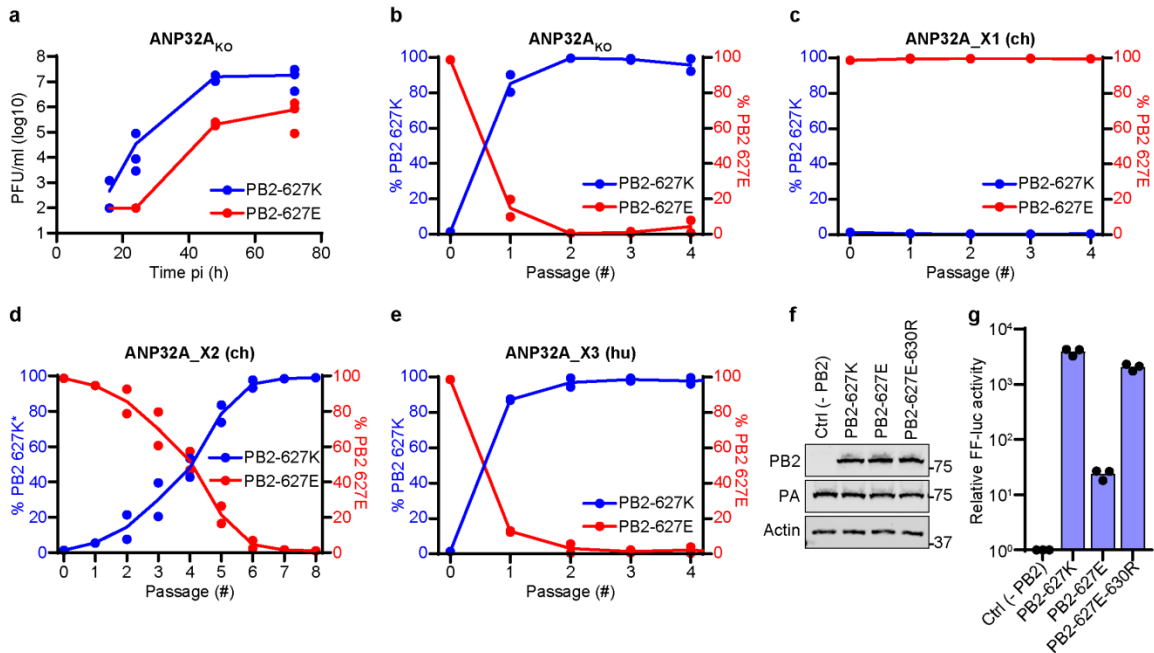

**Supplementary Figure 1. ANP32A variants differentially impact avian-signature IAV replication and selection.** (a) Viral growth kinetics of rWSN-based viruses expressing PB2-627E or PB2-627K in A549-ANP32A<sub>KO</sub> cells (MOI = 0.001 PFU/cell). Mean values from three independent experiments are plotted, with the individual data points shown. (b-e) Competition assays between rWSN-based viruses expressing PB2-627E or PB2-627K (99:1 input ratio) in the indicated cell-lines. P0 represents input. Percentage of PB2-627K/E was determined by NGS. Mean values from two independent experiments are plotted, with the individual data points shown. \*Note, for panel d, levels of the compensatory PB2-630R mutation were also determined and included together with PB2-627K. (f) Western blot analysis of lysates from human 293T cells transfected with the indicated vPol constructs. (g) Polymerase reconstitution assay assessing the ability of PB2-630R to compensate for PB2-627E vPol activity in human 293T cells. Bars represent mean values from three independent experiments, with the individual data points shown. Source data for all panels are provided in the Source Data file.

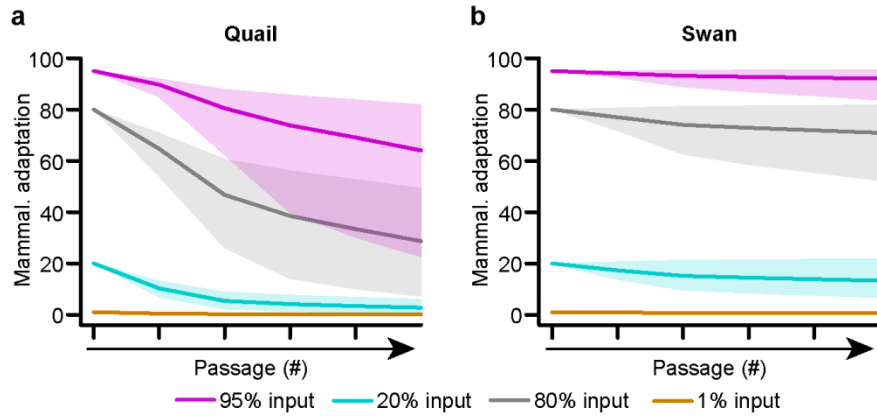

**Supplementary Figure 2. Modeling the impact of species' ANP32A splice variant ratios on selection of mammalian- or avian-like IAV adaptations.** (a-b) Model predictions of mammalian-like vPol substitution selection in the indicated species, taking into account their ANP32A splice variant ratios as shown in Figure 3a. Each input mammalian-like vPol percentage assessed is indicated by a separate color. The solid lines indicate the model prediction with the best estimates of virus production rates, and the lighter areas show the 95% bootstrap confidence intervals.

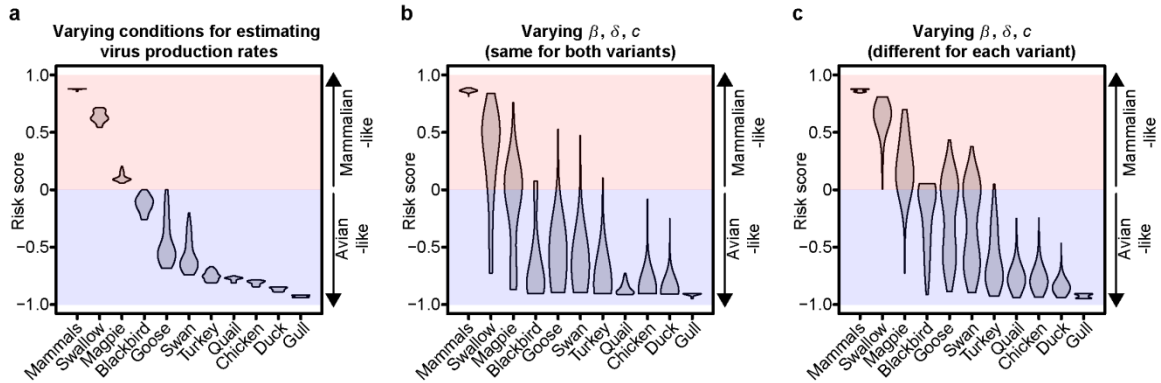

**Supplementary Figure 3. Sensitivity analyses of the model to predict the impact of ANP32A splice variant ratio on selection of mammalian-like IAV adaptations.** (a-c) Violin plots of the estimated relative risk scores for each indicated species to select for avian- or mammalian-signature vPol adaptations: (a) varying conditions for estimating virus production rates; (b) varying infection rate ( $\beta$ ), rate of infected cell death ( $\delta$ ), and rate of viral clearance ( $c$ ) [same for both variants]; (c) varying infection rate ( $\beta$ ), rate of infected cell death ( $\delta$ ), and rate of viral clearance ( $c$ ) [different for each variant].

**Supplementary Table 1**

**Summary of ANP32A transcript analyses from cells of different species**

| Species (cell-line)                                              | aa sequence                                          | ANP32A transcript (% $\pm$ SD)          |
|------------------------------------------------------------------|------------------------------------------------------|-----------------------------------------|
| Human (A549 cultured at 33° or 37°C; BEPC; NEPC; SAEPC or HTEpC) | GYDRDDKEAPSDAEGYVEGLDDEEDEDDEEEYDEDAQVVEDEEDED       | X3-like (100%)                          |
| Pig (PK-15) <sup>1</sup>                                         | GYDRDDKEASDSDAEGYVEGLDDEEDEDDEEEYDEDAQVVEDEEDED      | X3-like (100%)                          |
| Pig (NSK)                                                        | GYDRDDKEASDSDAEGYVEGLDDEEDEDDEEEYDEDAQVVEDEEDED      | X3-like (100%)                          |
| Dog (MDCK) <sup>2</sup>                                          | GYDRDDKEAPSDAEGYVEGLDDEEDEDDEEEYDEDAQVVEDEEDED       | X3-like (100%)                          |
| Mouse (MEFs)                                                     | GYDRDNKEAPSDVEGYVEDDDEEDEDDEEEYDEYAQLVEDEEEDEED      | X3-like (100%)                          |
| Bat (PaKi)                                                       | GYDRDDKEAPSDAEGYVEGLDDEEDEDDEEEYDEDAQVVEDEEDEDDEE    | X3-like (100%)                          |
| Horse (NBL6)                                                     | GYDRDDKEAPSDAEGYVEGLDDEEDEDDEEEYDEDAQVVEDEEDED       | X3-like (90 $\pm$ 2.3% )                |
| <i>Horse (NBL6)</i>                                              | <i>GYDRDDKEAPSDAEGYVEGLDDEEDVSGEEEEDEEGYNDGEVDRS</i> | <i>Other (10 <math>\pm</math> 2.3%)</i> |
| Chicken (DF-1)                                                   | GYDRDDKEAPSDAEGYVEGLDDEEDEDVLSLVKDRDDKEAPSDAEG       | X1-like (66.0 $\pm$ 0.3 %)              |
| Chicken (DF-1)                                                   | GYDRDDKEAPSDAEGYVEGLDDEEDEDVKDRDDKEAPSDAEGYVEG       | X2-like (24.9 $\pm$ 0.5%)               |
| Chicken (DF-1)                                                   | GYDRDDKEAPSDAEGYVEGLDDEEDEDDEEEYDDDAQVVEDEED         | X3-like (9.1 $\pm$ 0.8%)                |
| Chicken (CAM <sup>3</sup> )                                      | GYDRDDKEAPSDAEGYVEGLDDEEDEDVLSLVKDRDDKEAPSDAEG       | X1-like (65.2 $\pm$ 1.6 %)              |
| Chicken (CAM)                                                    | GYDRDDKEAPSDAEGYVEGLDDEEDEDVKDRDDKEAPSDAEGYVEG       | X2-like (26.2 $\pm$ 2.3%)               |
| Chicken (CAM)                                                    | GYDRDDKEAPSDAEGYVEGLDDEEDEDDEEEYDDDAQVVEDEED         | X3-like (8.6 $\pm$ 0.8%)                |

<sup>1</sup> ANP32A transcripts are identical between the porcine PK-15 and NSK cell lines.

<sup>2</sup> Dog (MDCK) sample presents two ANP32A variants coding for identical proteins (underlined, the synonymous, t→c, SNP).

clANP32A\_A:

tatctc gatggctacgaccgggacgacaaggaggccccgactcggacgctgagggtctacgtggaggcctggatgacgacgaggaggacgagga  
tgaagaagaatgatgaagatgctcaggtagtgaagacgaggaggatgaagagg

clanp32a\_b:

tatctc gatggctacgaccgggacgacaaggaggccccgactcggacgctgagggtctacgtggaggcctggatgacgacgaggaggacgagga  
atgaagaagaatgatgaagatgctcaggtagtgaagacgaggaggatgaagagg

<sup>3</sup> CAM, chorioallantoic membrane (n = 3).

| Species (cell-line)       | aa sequence                                     | ANP32A transcript (% $\pm$ SD) |
|---------------------------|-------------------------------------------------|--------------------------------|
| Chicken (LMH-1)           | GYDRDDKEAPSDAEGYVEGLDDEEEDEDVLSLVKDRDDKEAPSDAEG | X1-like<br>(62.6 $\pm$ 1.2 %)  |
| Chicken (LMH-1)           | GYDRDDKEAPSDAEGYVEGLDDEEEDEDVKDRDDKEAPSDAEGYVEG | X2-like<br>(26.7 $\pm$ 0.3%)   |
| Chicken (LMH-1)           | GYDRDDKEAPSDAEGYVEGLDDEEEDEDEEEYDDDAQVVEDEED    | X3-like<br>(10.8 $\pm$ 1.1%)   |
| Chicken (SL-29)           | GYDRDDKEAPSDAEGYVEGLDDEEEDEDVLSLVKDRDDKEAPSDAEG | X1-like<br>(62.0 $\pm$ 1.5 %)  |
| Chicken (SL-29)           | GYDRDDKEAPSDAEGYVEGLDDEEEDEDVKDRDDKEAPSDAEGYVEG | X2-like<br>(28.5 $\pm$ 1.3%)   |
| Chicken (SL-29)           | GYDRDDKEAPSDAEGYVEGLDDEEEDEDEEEYDDDAQVVEDEED    | X3-like<br>(9.6 $\pm$ 1.3%)    |
| Duck (CCL-141)            | GYDRDDKEAPSDAEGYVEGLDDEEEDEDVLSLVKDRDDKEA       | X1-like<br>(76.7 $\pm$ 1.3%)   |
| Duck (CCL-141)            | GYDRDDKEAPSDAEGYVEGLDDEEEDEDVKDRDDKEAPSDAE      | X2-like<br>(19.4 $\pm$ 1.6%)   |
| Duck (CCL-141)            | GYDRDDKEAPSDAEGYVEGLDDEEEDEDEEEYDDDAQDR         | X3-like<br>(3.9 $\pm$ 0.3%)    |
| Mallard (SEF-R)           | GYDRDDKEAPSDAEGYVEGLDDEEEDEDVLSLVKDRDDKEAP      | X1-like<br>(82.9 $\pm$ 1.5%)   |
| Mallard (SEF-R)           | GYDRDDKEAPSDAEGYVEGLDDEEEDEDVKDRDDKEAPSDAE      | X2-like<br>(15.4 $\pm$ 1.6%)   |
| Mallard (SEF-R)           | GYDRDDKEAPSDAEGYVEGLDDEEEDEDEEEYDDDAQDR         | X3-like<br>(1.7 $\pm$ 0.2%)    |
| Turkey (PF-R)             | GYDRDDKEAPSDAEGYVEGLDDEEEDEDVLSLVKDRDDKEAPSDAEG | X1-like<br>(67.9 $\pm$ 1.7%)   |
| Turkey (PF-R)             | GYDRDDKEAPSDAEGYVEGLDDEEEDEDVKDRDDKEAPSDAEGYVEG | X2-like<br>(23.1 $\pm$ 1.3%)   |
| Turkey (PF-R)             | GYDRDDKEAPSDAEGYVEGLDDEEEDEDEEEYDDDAQVVEDEEDR   | X3-like<br>(9.0 $\pm$ 1.7%)    |
| Quail (QT-6)              | GYDRDDKEAPSDAEGYVEGLDDEEEDEDVLSLVKDRDDKEAPSDA   | X1-like<br>(61.9 $\pm$ 0.7%)   |
| Quail (QT-6)              | GYDRDDKEAPSDAEGYVEGLDDEEEDEDVKDRDDKEAPSDAEGYV   | X2-like<br>(38.1 $\pm$ 0.7%)   |
| Gull (SMF-R)              | GYDRDDKEAPSDAEGYVEGLDDEEEDEDVLSLVKDRDDKEAPSDAEG | X1-like<br>(100%)              |
| Goose (GF-R) <sup>4</sup> | GYDRDDKEAPSDAEGYVEGLDDEEEDEDVLSLVKDRDDKEAPSDAEG | X1-like<br>(67.7 $\pm$ 1.3%)   |
| Goose (GF-R)              | GYDRDDKEAPSDAEGYVEGLDDEEEDEDVKDRDDKEAPSDAEGYVEG | X2-like<br>(6.9 $\pm$ 0.6%)    |
| Goose (GF-R)              | GYDRDDKEAPSDAEGYVEGLDDEEEDEDEEEYDDDAQVVEDEEDR   | X3-like<br>(25.4 $\pm$ 1.7%)   |

<sup>4</sup> ANP32A transcripts are identical between the three goose cell lines (GF-R, GN-R and CCL-169).

| Species (cell-line)          | aa sequence                                       | ANP32A transcript (% ± SD) |
|------------------------------|---------------------------------------------------|----------------------------|
| Goose (GN-R) <sup>4</sup>    | GYDRDDKEAPDSDAEGYVEGLDDEEEDEDVLSLVKDRDDKEAPDSDAEG | X1-like<br>(65.5 ± 0.5%)   |
| Goose (GN-R)                 | GYDRDDKEAPDSDAEGYVEGLDDEEEDEDVKDRDDKEAPDSDAEGYVEG | X2-like<br>(6.1 ± 0.2%)    |
| Goose (GN-R)                 | GYDRDDKEAPDSDAEGYVEGLDDEEEDEDEEEYDDDAQVVEDEEDR    | X3-like<br>(28.4 ± 0.5%)   |
| Goose (CCL-169) <sup>4</sup> | GYDRDDKEAPDSDAEGYVEGLDDEEEDEDVLSLVKDRDDKEAPDSDAEG | X1-like<br>(66.6 ± 0.6%)   |
| Goose (CCL-169)              | GYDRDDKEAPDSDAEGYVEGLDDEEEDEDVKDRDDKEAPDSDAEGYVEG | X2-like<br>(8.8 ± 0.1%)    |
| Goose (CCL-169)              | GYDRDDKEAPDSDAEGYVEGLDDEEEDEDEEEYDDDAQVVEDEEDR    | X3-like<br>(24.6 ± 0.7%)   |
| Mute swan (SWD-R)            | GYDRDDKEAPDSDAEGYVEGLDDEEEDEDVLSLVKDRDDKEAPDSDAEG | X1-like<br>(69.1 ± 1.6%)   |
| Mute swan (SWD-R)            | GYDRDDKEAPDSDAEGYVEGLDDEEEDEDVKDRDDKEAPDSDAEGYVEG | X2-like<br>(7.4 ± 0.5%)    |
| Mute swan (SWD-R)            | GYDRDDKEAPDSDAEGYVEGLDDEEEDEDEEEYDDDAQVVEDEEDR    | X3-like<br>(23.5 ± 1.9%)   |
| Swallow (CS1T1-R)            | GYDRDDKEAPDSDAEGYVEGLDDEEEDEDVLSLVKDRDDKEAPDSDAEG | X1-like<br>(14.0 ± 1.1%)   |
| Swallow (CS1T1-R)            | GYDRDDKEAPDSDAEGYVEGLDDEEEDEDVKDRDDKEAPDSDAEGYVEG | X2-like<br>(25.2 ± 1.1%)   |
| Swallow (CS1T1-R)            | GYDRDDKEAPDSDAEGYVEGLDDEEEDEDEEEYDDDAQVVEDEEDR    | X3-like<br>(60.8 ± 2.0%)   |
| Blackbird (TME-R)            | GYDRDDKEAPDSDAEGYVEGLDDEEEDEDALSLVKDRDDKEAPDSDAEG | X1-like<br>(36.9 ± 2.0%)   |
| Blackbird (TME-R)            | GYDRDDKEAPDSDAEGYVEGLDDEEEDEDVKDRDDKEAPDSDAEGYVEG | X2-like<br>(59.0 ± 1.8%)   |
| Blackbird (TME-R)            | GYDRDDKEAPDSDAEGYVEGLDDEEEDEDEEEYDDDAQVVEDEEDR    | X3-like<br>(4.1 ± 0.2%)    |
| Magpie (EGE-R)               | GYDRDDKEAPDSDAEGYVEGLDDEEEDEDVLSLVKDRDDKEAPDSDAEG | X1-like<br>(31.3 ± 0.2%)   |
| Magpie (EGE-R)               | GYDRDDKEAPDSDAEGYVEGLDDEEEDEDVKDRDDKEAPDSDAEGYVEG | X2-like<br>(33.0 ± 1.3%)   |
| Magpie (EGE-R)               | GYDRDDKEAPDSDAEGYVEGLDDEEEDEDEEEYDDDAQVVEDEEDR    | X3-like<br>(35.7 ± 1.4%)   |

Alignment of the aa sequences of ANP32A X1-like transcripts as found in the analyzed species:

```

Chicken    GYDRDDKEAPSDAEGYVEGLDDEEEEDDVLSLVKDRDDKEAP
Duck       GYDRDDKEAPSDAEGYVEGLDDEEEEDDVLSLVKDRDDKEAP
Mallard    GYDRDDKEAPSDAEGYVEGLDDEEEEDDVLSLVKDRDDKEAP
Turkey     GYDRDDKEAPSDAEGYVEGLDDEEEEDDVLSLVKDRDDKEAP
Quail      GYDRDDKEAPSDAEGYVEGLDDEEEEDDVLSLVKDRDDKEAP
Goose      GYDRDDKEAPSDAEGYVEGLDDEEEEDDVLSLVKDRDDKEAP
Mute swan  GYDRDDKEAPSDAEGYVEGLDDEEEEDDVLSLVKDRDDKEAP
Swallow    GYDRDDKEAPSDAEGYVEGLDDEEEEDDVLSLVKDRDDKEAP
Blackbird  GYDRDDKEAPSDAEGYVEGLDDEEEEDDALSLVKDRDDKEAP
Magpie     GYDRDDKEAPSDAEGYVEGLDDEEEEDDVLSLVKDRDDKEAP
*****.*****

```

Alignment of the aa sequences of ANP32A X2-like transcripts:

```

Chicken    GYDRDDKEAPSDAEGYVEGLDDEEEEDDVKDRDDKEAPSDAE
Duck       GYDRDDKEAPSDAEGYVEGLDDEEEEDDVKDRDDKEAPSDAE
Mallard    GYDRDDKEAPSDAEGYVEGLDDEEEEDDVKDRDDKEAPSDAE
Turkey     GYDRDDKEAPSDAEGYVEGLDDEEEEDDVKDRDDKEAPSDAE
Quail      GYDRDDKEAPSDAEGYVEGLDDEEEEDDVKDRDDKEAPSDAE
Goose      GYDRDDKEAPSDAEGYVEGLDDEEEEDDVKDRDDKEAPSDAE
Mute swan  GYDRDDKEAPSDAEGYVEGLDDEEEEDDVKDRDDKEAPSDAE
Swallow    GYDRDDKEAPSDAEGYVEGLDDEEEEDDVKDRDDKEAPSDAE
Blackbird  GYDRDDKEAPSDAEGYVEGLDDEEEEDDVKDRDDKEAPSDAE
Magpie     GYDRDDKEAPSDAEGYVEGLDDEEEEDDVKDRDDKEAPSDAE
*****

```

Alignment of the aa sequences of ANP32A X3-like transcripts:

```

Human      GYDRDDKEAPSDAEGYVEGLDDEEEEDDEEYDEDAQVV
Pig        GYDRDDKEASDSAEGYVEGLDDEEEEDDEEYDEDAQVV
Dog        GYDRDDKEAPSDAEGYVEGLDDEEEEDDEEYDEDAQVV
Mouse      GYDRDNKEAPSDVEGYVEDD--DEEEDDEEYDEYAQLV
Bat        GYDRDDKEAPSDAEGYVEGLDDEEEEDDEEYDEDAQVV
Horse      GYDRDDKEAPSDAEGYVEGLDDEEEEDDEEYDEDAQVV
Chicken    GYDRDDKEAPSDAEGYVEGLDDEEEEDDEEYDDDAQVV
Duck       GYDRDDKEAPSDAEGYVEGLDDEEEEDDEEYDDDAQDR
Mallard    GYDRDDKEAPSDAEGYVEGLDDEEEEDDEEYDDDAQDR
Turkey     GYDRDDKEAPSDAEGYVEGLDDEEEEDDEEYDDDAQVV
Goose      GYDRDDKEAPSDAEGYVEGLDDEEEEDDEEYDDDAQVV
Mute swan  GYDRDDKEAPSDAEGYVEGLDDEEEEDDEEYDDDAQVV
Swallow    GYDRDDKEAPSDAEGYVEGLDDEEEEDDEEYDDDAQVV
Blackbird  GYDRDDKEAPSDAEGYVEGLDDEEEEDDEEYDDDAQVV
Magpie     GYDRDDKEAPSDAEGYVEGLDDEEEEDDEEYDDDAQVV
*****:***  ***.*****. :*****: **

```

In bold, the aspartate (**D**) at the 5' end of the splicing site of avian ANP32A. Underlined, the SLS site present in the X1-like variants.



**Supplementary Table 2**

**Summary of ANP32A transcript analyses from different primary chicken tissues**

| <b>Tissue</b>   | <b>ANP32A transcript variant</b> |               |               |
|-----------------|----------------------------------|---------------|---------------|
|                 | <b>X1 (%)</b>                    | <b>X2 (%)</b> | <b>X3 (%)</b> |
| Brain           | 74.3                             | 13.3          | 12.4          |
| Cecum           | 72.1                             | 16.1          | 11.8          |
| Eye             | 71.1                             | 17.3          | 11.6          |
| Heart           | 74.1                             | 12.9          | 13.0          |
| Kidney          | 71.8                             | 16.6          | 11.6          |
| Liver           | 70.5                             | 17.6          | 11.9          |
| Lung            | 68.7                             | 18.6          | 12.8          |
| Small intestine | 75.4                             | 13.5          | 11.1          |
| Skeletal muscle | 73.0                             | 17.0          | 10.0          |
| Spleen          | 68.3                             | 20.4          | 11.4          |

### Supplementary Table 3

#### Summary of cells and cell-lines used in this study

| Cell ID | Source                                                             | Provider                           | Species                      |
|---------|--------------------------------------------------------------------|------------------------------------|------------------------------|
| A549    | Human lung epithelial carcinoma                                    | ATCC <sup>1</sup>                  | <i>H. sapiens</i>            |
| BEPC    | Human primary bronchial epithelial cells                           | PromoCell <sup>2</sup>             | <i>H. sapiens</i>            |
| NEPC    | Human primary nasal epithelial cells                               | PromoCell                          | <i>H. sapiens</i>            |
| SAEPC   | Human primary small airway epithelial cells                        | PromoCell                          | <i>H. sapiens</i>            |
| HTEpC   | Human primary tracheal epithelial cells                            | PromoCell                          | <i>H. sapiens</i>            |
| HEK293T | Human, embryonic kidney (transformed, epithelial)                  | ATCC                               | <i>H. sapiens</i>            |
| PK-15   | Swine kidney adult (spontaneously immortalized, epithelial)        | Lanz <i>et al.</i> <sup>3</sup>    | <i>S. scrofa</i>             |
| NSK     | Swine kidney newborn (spontaneously immortalized, epithelial)      | Lanz <i>et al.</i>                 | <i>S. scrofa</i>             |
| MDCK    | Canine kidney adult (spontaneously immortalized, epithelial)       | ATCC                               | <i>C. familiaris</i>         |
| MEF     | Murine embryonic fibroblasts (immortalized)                        | ATCC                               | <i>M. musculus</i>           |
| PaKi    | Pteropid bat kidney (immortalized, epithelial)                     | Crameri <i>et al.</i> <sup>4</sup> | <i>P. alecto</i>             |
| NBL6    | Horse, dermal fibroblasts                                          | ATCC                               | <i>E. caballus</i>           |
| DF-1    | Chicken, embryonal fibroblasts spontaneously transformed           | ATCC                               | <i>G. gallus</i>             |
| LMH-1   | Chicken, hepatocellular carcinoma (chemically induced, epithelial) | ATCC                               | <i>G. gallus</i>             |
| SL-29   | Chicken, embryonal fibroblasts                                     | ATCC                               | <i>G. gallus</i>             |
| CAM     | Chicken, chorioallantoic membrane                                  | AnimalCo                           | <i>G. gallus</i>             |
| CCL-141 | Duck, embryonic fibroblasts                                        | ATCC                               | <i>A. platyrhynchus dom.</i> |
| SEF-R   | Mallard, whole embryo                                              | CCLV FLI <sup>5</sup>              | <i>A. platyrhynchus</i>      |
| PF-R    | Turkey, whole embryo                                               | CCLV FLI                           | <i>M. gallopavo f. dom.</i>  |
| QT-6    | Quail, methylcholanthrene induced fibroblast                       | CCLV FLI                           | <i>C. coturnix japonica</i>  |
| SMF-R   | Gull, whole Embryo                                                 | CCLV FLI                           | <i>L. canus</i>              |
| GF-R    | Goose, whole embryo                                                | CCLV FLI                           | <i>A. anser f. dom.</i>      |
| GN-R    | Goose, kidney adult(epithelial)                                    | CCLV FLI                           | <i>A. anser f. dom.</i>      |
| CCL-169 | Goose, sternum fibroblasts                                         | ATCC                               | <i>A. anser</i>              |
| SWD-R   | Mute swan, intestine (epithelial)                                  | CCLV FLI                           | <i>C. olor</i>               |
| CS1T1-R | Swallow, whole embryo                                              | CCLV FLI                           | <i>P. pyrrhonota</i>         |
| TME-R   | Blackbird, whole embryo                                            | CCLV FLI                           | <i>T. merula</i>             |
| EGE-R   | Magpie, whole embryo                                               | CCLV FLI                           | <i>P. pica</i>               |

<sup>1</sup> ATCC, American Type Culture Collection.

<sup>2</sup> PromoCell GmbH (Heidelberg, Germany)

<sup>3</sup> Lanz, C., Yanguéz, E., Andenmatten, D., and Stertz, S. (2015). Swine interferon-inducible transmembrane proteins potently inhibit influenza A virus replication. *J Virol* 89, 863-869.

<sup>4</sup> Crameri, G., Todd, S., Grimley, S., McEachern, J.A., Marsh, G.A., Smith, C., Tachedjian, M., De Jong, C., Virtue, E.R., Yu, M., *et al.* (2009). Establishment, immortalisation and characterisation of pteropid bat cell lines. *PLoS One* 4, e8266.

<sup>5</sup> Collection of Cell Lines in Veterinary Medicine (CCLV), Friedrich-Loeffler-Institut (FLI), Insel Riems, Germany.

**Supplementary Table 4**

**Summary of primer pairs used for the NGS-based determination of ANP32A splice variants in different species**

| Primer ID        | Sequence                                                                           | Species                               |
|------------------|------------------------------------------------------------------------------------|---------------------------------------|
| humANP32A-NGS-F  | <u>CTT TCC CTA CAC GAC GCT CTT CCG ATC TTA TCT CGA CGG CTA TGA CC</u> <sup>1</sup> | Human ( <i>H. sapiens</i> )           |
| humANP32A-NGS-R  | <u>GAC TGG AGT TCA GAC GTG TGC TCT TCC GAT CTA TCG TTA TAA CCT TCT TCA TCC</u>     | Human ( <i>H. sapiens</i> )           |
| ssANP32A-NGS-F   | <u>CTT TCC CTA CAC GAC GCT CTT CCG ATC TTA TCT CGA TGG CTA CGA CC</u>              | Pig ( <i>S. scrofa</i> )              |
| ssANP32A-NGS-R   | <u>GAC TGG AGT TCA GAC GTG TGC TCT TCC GAT CTA TCG TTA TAA CCT TCC TCA TCC</u>     | Pig ( <i>S. scrofa</i> )              |
| clANP32A-NGS-R   | <u>CTT TCC CTA CAC GAC GCT CTT CCG ATC TTA TCT CGA TGG CTA CGA CC</u>              | Dog ( <i>C. familiaris</i> )          |
| clANP32A-NGS-R   | <u>GAC TGG AGT TCA GAC GTG TGC TCT TCC GAT CTT TAT AAC CCT CTT CAT CCT CC</u>      | Dog ( <i>C. familiaris</i> )          |
| mmANP32A-NGS-F   | <u>CTT TCC CTA CAC GAC GCT CTT CCG ATC TTA CCT CGA TGG CTA TGA CAG</u>             | Mouse ( <i>M. musculus</i> )          |
| mmANP32A-NGS-R   | <u>GAC TGG AGT TCA GAC GTG TGC TCT TCC GAT CTT CAT TGT AAC CTT CCT CAT CC</u>      | Mouse ( <i>M. musculus</i> )          |
| batANP32A-NGS-F  | <u>CTT TCC CTA CAC GAC GCT CTT CCG ATC TTG ATG GCT ATG ACC GGG ATG</u>             | Bat ( <i>P. alecto</i> )              |
| batANP32A-NGS-R  | <u>GAC TGG AGT TCA GAC GTG TGC TCT TCC GAT CTA CTT CCC CGT CGT TAT AAC C</u>       | Bat ( <i>P. alecto</i> )              |
| ecANP32A-NGS-F   | <u>CTT TCC CTA CAC GAC GCT CTT CCG ATC TTA CCT CGA CGG CTA CGA CC</u>              | Horse ( <i>E. caballus</i> )          |
| ecANP32A-NGS-R   | <u>GAC TGG AGT TCA GAC GTG TGC TCT TCC GAT CTA TCT ACT TCC CCG TCA TTA TAA CC</u>  | Horse ( <i>E. caballus</i> )          |
| ggANP32A-NGS-F   | <u>CTT TCC CTA CAC GAC GCT CTT CCG ATC TAT GGC TAC GAT CGG GAT GAC</u>             | Chicken ( <i>G. gallus</i> )          |
| ggANP32A-NGS-R   | <u>GAC TGG AGT TCA GAC GTG TGC TCT TCC GAT CTT CTT CAT CTT CTA CTA CCT GAG C</u>   | Chicken ( <i>G. gallus</i> )          |
| apANP32A-NGS-2-F | <u>CTT TCC CTA CAC GAC GCT CTT CCG ATC TCA ACT CAC ATA CCT CGA TGG</u>             | Duck ( <i>A. platyrhynchos dom.</i> ) |
| apANP32A-NGS-2-R | <u>GAC TGG AGT TCA GAC GTG TGC TCT TCC GAT CTT GAG CGT CAT CAT CAT ACT CC</u>      | Duck ( <i>A. platyrhynchos dom.</i> ) |
| apANP32A-NGS-2-F | <u>CTT TCC CTA CAC GAC GCT CTT CCG ATC TCA ACT CAC ATA CCT CGA TGG</u>             | Mallard ( <i>A. platyrhynchos</i> )   |
| ansANP32A-NGS-R  | <u>GAC TGG AGT TCA GAC GTG TGC TCT TCC GAT CTT CTT CGT CTT CTA CTA CCT GAG C</u>   | Mallard ( <i>A. platyrhynchos</i> )   |
| ggANP32A-NGS-F   | <u>CTT TCC CTA CAC GAC GCT CTT CCG ATC TAT GGC TAC GAT CGG GAT GAC</u>             | Turkey ( <i>M. gallopavo</i> )        |
| ggANP32A-NGS-R   | <u>GAC TGG AGT TCA GAC GTG TGC TCT TCC GAT CTT CTT CAT CTT CTA CTA CCT GAG C</u>   | Turkey ( <i>M. gallopavo</i> )        |
| cjANP32A-NGS-F   | <u>CTT TCC CTA CAC GAC GCT CTT CCG ATC TAT ACC TCG ATG GCT ACG ATC GG</u>          | Quail ( <i>Coturnix c. japonica</i> ) |
| cjANP32A-NGS-R   | <u>GAC TGG AGT TCA GAC GTG TGC TCT TCC GAT CTA CGT CAC CAT CAT TAT AGC CTT CC</u>  | Quail ( <i>Coturnix c. japonica</i> ) |

<sup>1</sup> Underlined, the priming sites for 2<sup>nd</sup> round PCR primers, TS-D50x+TS-D70y of the Illumina®, TruSeq HT series.

|                   |                                                                                     |                                      |
|-------------------|-------------------------------------------------------------------------------------|--------------------------------------|
| ruffANP32A-NGS-F  | <u>CTT TCC CTA CAC GAC GCT CTT CCG ATC TAT GGC TAC GAC CGG</u><br>GAC GAC           | Common gull ( <i>L. canus</i> )      |
| ansANP32A_NGS-R   | <u>GAC TGG AGT TCA GAC GTG TGC TCT TCC GAT CTT CTT CGT CTT</u><br>CTA CTA CCT GAG C | Common gull ( <i>L. canus</i> )      |
| ansANP32A_NGS-F   | <u>CTT TCC CTA CAC GAC GCT CTT CCG ATC TAT GGC TAC GAT CGG</u><br>GAC GAC           | Goose ( <i>Anser anser f. dom.</i> ) |
| ansANP32A_NGS-R   | <u>GAC TGG AGT TCA GAC GTG TGC TCT TCC GAT CTT CTT CGT CTT</u><br>CTA CTA CCT GAG C | Goose ( <i>Anser anser f. dom.</i> ) |
| apANP32A-NGS-2-F  | <u>CTT TCC CTA CAC GAC GCT CTT CCG ATC TCA ACT CAC ATA CCT</u><br>CGA TGG           | Mute swan ( <i>C. olor</i> )         |
| ansANP32A_NGS-R   | <u>GAC TGG AGT TCA GAC GTG TGC TCT TCC GAT CTT CTT CGT CTT</u><br>CTA CTA CCT GAG C | Mute swan ( <i>C. olor</i> )         |
| starlANP32A-NGS-F | <u>CTT TCC CTA CAC GAC GCT CTT CCG ATC TAC GGA TAC GAC CGG</u><br>GAT GAC           | Swallow ( <i>P. pyrrhonota</i> )     |
| starlANP32A-NGS-R | <u>GAC TGG AGT TCA GAC GTG TGC TCT TCC GAT CTT CTT CAT CCT</u><br>CCA CTA CCT GAG C | Swallow ( <i>P. pyrrhonota</i> )     |
| starlANP32A-NGS-F | <u>CTT TCC CTA CAC GAC GCT CTT CCG ATC TAC GGA TAC GAC CGG</u><br>GAT GAC           | Blackbird ( <i>T. merula</i> )       |
| starlANP32A-NGS-R | <u>GAC TGG AGT TCA GAC GTG TGC TCT TCC GAT CTT CTT CAT CCT</u><br>CCA CTA CCT GAG C | Blackbird ( <i>T. merula</i> )       |
| corvusANP32-NGS-F | <u>CTT TCC CTA CAC GAC GCT CTT CCG ATC TAT GGA TAC GAC CGG</u><br>GAT GAC           | Magpie ( <i>P. pica</i> )            |
| corvusANP32-NGS-R | <u>GAC TGG AGT TCA GAC GTG TGC TCT TCC GAT CTT CCT CGT CCT</u><br>CCA CTA CCT GAG C | Magpie ( <i>P. pica</i> )            |
| 3xFl-ANP32A-NGS-F | <u>CTT TCC CTA CAC GAC GCT CTT CCG ATC TAC GGC TAC GAC CGG</u><br>GAC GAC           | Exogenous ANP32A                     |
| 3xFl-ANP32A-NGS-R | <u>GAC TGG AGT TCA GAC GTG TGC TCT TCC GAT CTT CTT CAT CTT</u><br>CCA CCA CCT GGG C | Exogenous ANP32A                     |
